# Supplementary material for: Species differences in drug plasma protein binding
Source: Royal Society of Chemistry journal article supplement (doi:10.1039/c4md00148f), 2014-01-01
Supplement: c4md00148f1.xlsx [file c4md00148f1.xlsx]

## Sheet: Lit examples
Supplembentary information 2. Details of literature compounds.
Compound	%bound Rat	%bound Human	%bound Dog	%bound Mouse	Reference
Valproate	63.4	94.8	78.5	11.9	W. J. Loscher Pharmacology and experimental therapeutics, 1978, 204(2), 255.
Zamifenacin	99.8	99.99	99.9		K. C. Beaumont, A. G. Causey, P. E. Coates and D. A. Smith, D. A. Xenobiotica, 1996, 26, 459.
OMe-A1	99.9	99.5	99.8	99	H. Wang, M. Li, J. K. Rhie, D. M. Hockenbury, J. M. Covey, R. Zhang, and D. L. Hill, Cancer Chemother. Pharmacol, 2005, 56, 291.
OMe-A2	99.9	99.9	99.9	99.7	H. Wang, M. Li, J. K. Rhie, D. M. Hockenbury, J. M. Covey, R. Zhang, and D. L. Hill, Cancer Chemother. Pharmacol, 2005, 56, 291.
OMe-A3	99.8	99.9	99.3	99.1	H. Wang, M. Li, J. K. Rhie, D. M. Hockenbury, J. M. Covey, R. Zhang, and D. L. Hill, Cancer Chemother. Pharmacol, 2005, 56, 291.
OMe-A4	99.9	99.6	99.1	99.7	H. Wang, M. Li, J. K. Rhie, D. M. Hockenbury, J. M. Covey, R. Zhang, and D. L. Hill, Cancer Chemother. Pharmacol, 2005, 56, 291.
BMS-310705	62	69	77	66	A. V. Kamath, M. Chang, F. Lee, Y. Zhang and P. H. Marathe Cancer Chemother. Pharmacol, 2005, 56, 145.
COL-3	98	95			J. Li, S. Jing, H. Huynh and E. Chan Pharmaceutical Research, 2005, 22(3), 397.
Lopinavir	99.8	99.7	99.5	98.9	G. N. Kumar, V. K. Jayanti, M. K. Johnson, J. Uchic, S. Thomas, R. D. Lee, B. A. Grabowski, H. L. Sham, D. J. Kempf, J. F. Denissen, K. C. Marsh, E. Sun and S. A. Roberts Parmaceutical Research, 2004, 21(9), 1622.
Imatinib	65	70	45	50	O. Kretz, H. M. Weiss, M. M. schumacher and G. Gross British Journal of Clinical Pharmacology, 2004, 58(2), 212.
CGP74588	70	70	30	70	O. Kretz, H. M. Weiss, M. M. schumacher and G. Gross British Journal of Clinical Pharmacology, 2004, 58(2), 212.
Ampicillin	73	20	4		K. Walton, J. L. C. M. Dorne and A. G. Renwick Food and Chemical Toxicology, 2004, 42, 261.
Cefazolin	88	90			K. Walton, J. L. C. M. Dorne and A. G. Renwick Food and Chemical Toxicology, 2004, 42, 261.
Cefclidin	5	5	17	5	K. Walton, J. L. C. M. Dorne and A. G. Renwick Food and Chemical Toxicology, 2004, 42, 261.
Cefodizime	98	86	61	92	K. Walton, J. L. C. M. Dorne and A. G. Renwick Food and Chemical Toxicology, 2004, 42, 261.
Cefozopran	6	31	10	7	K. Walton, J. L. C. M. Dorne and A. G. Renwick Food and Chemical Toxicology, 2004, 42, 261.
Cefotetan	30	91	39	47	K. Walton, J. L. C. M. Dorne and A. G. Renwick Food and Chemical Toxicology, 2004, 42, 261.
Cefopirome	16	10	7	12	K. Walton, J. L. C. M. Dorne and A. G. Renwick Food and Chemical Toxicology, 2004, 42, 261.
Ceftazidime	4	10	11	2	K. Walton, J. L. C. M. Dorne and A. G. Renwick Food and Chemical Toxicology, 2004, 42, 261.
Ceftizoxime	32	30	17	13	K. Walton, J. L. C. M. Dorne and A. G. Renwick Food and Chemical Toxicology, 2004, 42, 261.
Ciprofloxacin	33	40			K. Walton, J. L. C. M. Dorne and A. G. Renwick Food and Chemical Toxicology, 2004, 42, 261.
Enprofylline	77	47	39	27	K. Walton, J. L. C. M. Dorne and A. G. Renwick Food and Chemical Toxicology, 2004, 42, 261.
Fluconazole	10	11	12	12	K. Walton, J. L. C. M. Dorne and A. G. Renwick Food and Chemical Toxicology, 2004, 42, 261.
NS-7	90.7	87.1	73.5		K. Nonaka, T. Tsujioka, K. Tougou and H. Mukai Arzneimittel-Forschlung, 2003, 53(9), 612.
GSQ1530	91	89			Y. Ge, S. Difuntorum, S. Touami, I, Critchley, R. Burli, V. Jiang, K. Drazan and H. Mozer Antimicrobial Agents and Chemotherapy, 2002, 46(10), 3168.
(-)-Biclomol	59	4	38		J. Visy, I. Fitos, G. Mady, L. Urge, P. Krajcsi and M. Simonyi Chirality, 2002, 14, 638.
(+)-Biclomol	66	24	57		J. Visy, I. Fitos, G. Mady, L. Urge, P. Krajcsi and M. Simonyi Chirality, 2002, 14, 638.
ATX-S10	73	97.7	87.2		M. Mori, T. Kuroda, A. Obana, I. Sakata,T. Hirano, S. Nakajima, M. Hikida and T. Kumagai Japanese Journal of Cancer Research, 2000, 91(8), 845.
[O-Methyl-11C]RS-15385-197	87	97			S. P. Hume, E. Hirani, J. Opacka-Juffry, S. Osman, R. Myers, R. N. Gunn, J. A. McCarron, R. D. Clark, J. Melichar, D. J. Nutt and V. W. Pike European Journal of Nuclear Medicine, 2000, 27(5), 475.
Celecoxib	98.3	97.4	98.5	98.3	S. K. Paulson, T. A. Kaprak, C. J. Gresk, D. M. Fast, M. T. Baratta, E. G. Burton, A. P. Breau and A. Karim Biopharmaceutics and Drug Disposition, 1999, 20(6), 293.
IT-066	65	70	60		M. Arai, Y. Nagase, T. Sasaki, K. Ota, K. Kataoka, M. Akimoto and S. Higuchi Yakuri to Chiryo, 1999, 27(4), 563.
Sildenafil	95	96	86	94	D. K. Walker, M. J. Ackland, G. C. James, G. J. Muirhead, D. J. Rance, P. Wastall and P. A. Wright Xenobiotica, 1999, 29(3), 297.
UK-103,320	89	95	86	94	D. K. Walker, M. J. Ackland, G. C. James, G. J. Muirhead, D. J. Rance, P. Wastall and P. A. Wright Xenobiotica, 1999, 29(3), 297.
[14C]Clobazapam	75	91	89		N. Yokoyama, T. Nishimoto, K. Ohata, S. Kohno, Y. Yoshida and K. Koike Iyakuhin Kenkyu, 1997, 28(6), 399.
CI-981	96.7	98.1	97.7	97.5	H. Nemoto, T. Oyama, Y. Karasawa, Y. Esumi, M. Watanabe, K. Kaneko and S. Oishi Yakuri to Chiryo, 1998, 26(8), 1229.
Hexarelin	69.9	66.4	77.6		M. Roumi, S. Marleau, P. Du Souich, H. Ong, M. F. Boghen, M. H. L. Nilsson and R. Deghenghi Growth Hormone Secretagogues in Clinical Practice [International Symposium on GH Scretetagogues], 2nd, Tampa, Fla., Mar., 1997, 221.
Tasulosin	79.8	99	90.2		H. Matsushima, H. Kamimura, Y. Soeishi, T. Watanabe, S. Higuchi and M. Tsunoo Drug Metabolism and Disposition, 1998, 26(3), 240.
RS 25-6833	97.5	95.7	84		W. F. Richter, P. Heizmann, J. Meyer, V. Starke and T. Lave Journal of Pharmaceutical Sciences, 1998, 87(4), 496.
II	96	86.8	80.4		W. F. Richter, P. Heizmann, J. Meyer, V. Starke and T. Lave Journal of Pharmaceutical Sciences, 1998, 87(4), 496.
III	98.5	93.1	68.6		W. F. Richter, P. Heizmann, J. Meyer, V. Starke and T. Lave Journal of Pharmaceutical Sciences, 1998, 87(4), 496.
IV	98.7	96	77.6		W. F. Richter, P. Heizmann, J. Meyer, V. Starke and T. Lave Journal of Pharmaceutical Sciences, 1998, 87(4), 496.
V	98.5	95.5	73.5		W. F. Richter, P. Heizmann, J. Meyer, V. Starke and T. Lave Journal of Pharmaceutical Sciences, 1998, 87(4), 496.
VI	96.3	95.3	84.4		W. F. Richter, P. Heizmann, J. Meyer, V. Starke and T. Lave Journal of Pharmaceutical Sciences, 1998, 87(4), 496.
Hexarelin	68.7	65.2	78.7		M. Roumi, S. Marleau, M. Boghen, M. Nilsson, P. Du Souich and H. Ong, Pharmaceutical Research, 1997, 14(8), 1008.
Ritonavir	97.2	99.3	98.9		J. F. Denissen, B. A. Grabowski, M. K. Johnson, A. M. Buko, D. J. Kempf, S. B. Thomas and B. W. Surber Drug Metabolism and Disposition, 1997, 25(4), 489.
Toborinone	94.5	91	65.5		M. Kitani, Y. Abe, N. Kusumoto, G. Miyamoto and M. Odomi Iyakuhin Kenkyu, 1996, 27(8), 545.
L-692,429	98.5	93.5	87		Leung, K. H. et al, Drug Metabolism and Disposition, 1996, 24(7), 753.
FRG-8813	61.5	88.5	68.5		T. Okuno, H. Kobayashi and S. Haruki Yakuri to Chiryo, 1995, 23(9), 2279.
EM-FU	39.5	32.5	49		T. Kawaguchi, M. Kubo, H. Akiyama and M. Odomi Yakabutsu Dotaie, 1994, 9(5), 661.
5-FU	17.5	15.5	16.5		T. Kawaguchi, M. Kubo, H. Akiyama and M. Odomi Yakabutsu Dotaie, 1994, 9(5), 661.
CNDP	55.5	68	62		T. Kawaguchi, M. Kubo, H. Akiyama and M. Odomi Yakabutsu Dotaie, 1994, 9(5), 661.
Clobazapam	75	86	90.5		N. Yokoyama, T. Nishimoto, K. Ohata, S. Kohno, Y. Yoshida and K. Koike Iyakuhin Kenkyu, 1994, 25(8), 589.
Talipexole	34.7	36.3			R. Kurakazu, T. Shibata, Y. Oiwa, C. Senda, S. Kobayashi, R. Matsumura, S-y. Hanawa and Y. Esumi Iyakuhin Kenkyu, 1994, 25(2), 99.
Resperidone	88.2	90	91.7		G. Mannens, W. Meuldermans, E. Snoeck and J. Heykants Psychopharmacology, 1994, 114(4), 566.
9-hydroxyresperidone	74.7	77.4	79.7		G. Mannens, W. Meuldermans, E. Snoeck and J. Heykants Psychopharmacology, 1994, 114(4), 566.
Acridine-4-carboxamide	83.7	96.6	91.9	85.2	S. M. H. Evans, I. G. C. Robertson and J. W. Paxton Journal of Pharmacy and Pharmacology, 1994, 46(1), 63.
Zolpidem	86.7	95.2			K. Ishibashi, T. Hashimoto, M. Katashima, Y. Tokuma and K. Noda Yakubutsu Dotai, 1993, 8(4), 445.
Verapamil	95	90			P. Manitpisitkul and W. L. Chiou Biopharmaceutics and Drug Disposition, 1993, 14(7), 555.
Bumetanide	98.15	98.02			H. J. Shim, M. G. Lee and M . H. Lee Journal of Clinical Pharmacy and Therapeutics, 1991, 16(6), 467.
Etoposide	48	95.1	37	60	R. A. Fleming, S. G. Arbuck and C. F. Stewart Biochemical Pharmacology, 1991, 42(11), 2246.
Angiotensin II	42.9	57.9	58.3		A. Nagai and S. Chida Yakubutsu Dotai, 1990, 5(5), 639.
KB-2796	60	80			T. Kawashima, N. Awata, O. Satomi, T. Nose, Y. Esumi, K. Mitsugi, Y. Katami, K. Ichige, H. Hirano and S. Yatsu Yakubutsu Dotai, 1990, 5(5), 723.
Brovavir	85	97			N. Yokoyama, H. Sakamoto, T. Nishimoto, M. Terao, K. Ohata, S. Kohno, K. Murai and H. Tatumi Iyakuhin Kenkyu, 1990, 21(3), 353.
Ketanserin	98.8	95.7	88.1		W. Meuldermans, J. Van Houdt, E. Mostmans, F. Knaeps, W. Verluyten and J. Heykants Arzneimittel-Forschung, 1988, 38(6), 794.
Diltiazem	75	60			S. Nakamura, T. Suzuki. Y. Sugawara, S. Usuki, Y. Ito, T. Kume, M. Yoshikawa, H. Endo, M. Ohashi and S. Harigaya Arzneimittel-Forschung, 1987, 37(11), 1244.
Tritoqualine	89	80	92		S. Iida, T. Komatsu, M. Iwamoto, H. Yoshimura, K. Nishigori, T. Sato, Y. Fujimura, O. Izawa and T. Inokuchi Oyo Yakuri, 1986, 31(4), 797.
Doxazosin	95.3	98.3			B. Kaye, N. J. Cussans, J. K. Faulkner, D. A. Stopher and J. L. Reid Biritish Journal of Clinical Pharmacology, 1986, 21(Suppl. 1), 19S.
Bunazosin	71	94			C. Yamato, T. Takahashi, K. Tadano, K. Kinoshita and T. Fujita Oyo Yakuri, 1985, 30(2), 257.
Glipizide	95.4	96.7			J. Sugihara, T. Yagishita and Y. Sato Proc. Symp. Drug Metab. Action, 5th, 1974, 11.
Digitoxin	80	80	80		J. D. Baggot and L. E. Davis Research in Veterinary Science, 1973, 15(1), 81.
Amphetamine	40.5	16.2	27.1	17.2	J. D. Baggot, L. E. Davis and C. A. Neff Biochemical Pharmacology, 1972, 21(13), 1813.
SB-203580	91.9	97.3	93.5	90.6	K. W. Ward, J. W. Proksch, L. M. Azzarano, J. A. Mumaw, T. J. Roethke, G. J. Stelman, M. J. Walsh, K. S. Zeigler, J. E. McSurdy-Freed, J. R. Kehler, J. Chokshi, M. A. Levy and B. R. Smith Xenobiotica, 2001, 31(11), 783.
DMXAA	97.4	97.9		95.4	S. Zhou, J. W. Paxton, P. Kestell and M. D. Tingle Journal of Pharmacy and Pharmacology, 2001, 53(4), 463.
8-methoxypsoralen	79	90			U. Busch, J. Schmid, F. W. Koss, H. Zipp and A. Zimmer Archives of Dermatological Research, 1978, 262(3), 255.
Am-80	99.8	99.7	99.7		K. Mizojiri, H. Okabe, K. Sugeno, A. Misaki, M. Ito, G. Kominami, Y. Esumi, M. Takaichi, T. Harada, H. Seki and A. Inaba, Arzniemittel-Forschung, 1997, 47, 259.
Cefpiramide	87.4	98.4	39.8		T. Ohshima, T. Hasegawa, I. Johno and S. Kitazawa Journal of Pharm. Pharmacol., 1991, 43, 805.
Valsartan	95	93.3	95	89	D. M. Colussi, C. Parisot, M. L. Rossolino, L. A. Brunner and G. Y. Lefevre Journal of Clinical Pharmacology, 1997, 37, 214.
Aminohydantoin I (R)	76	96.1	78.4		S. X. Peng, C. Henson and L. J. Wilson Journal of Chromatography B, 1999, 732, 31.
Aminohydantoin I (S)	65.9	94	71.2		S. X. Peng, C. Henson and L. J. Wilson Journal of Chromatography B, 1999, 732, 31.
Aminohydantoin II (R)	94.3	97.6	95		S. X. Peng, C. Henson and L. J. Wilson Journal of Chromatography B, 1999, 732, 31.
Aminohydantoin II (S)	91.8	94.2	92		S. X. Peng, C. Henson and L. J. Wilson Journal of Chromatography B, 1999, 732, 31.
Letrozole	56.2	60.1	54		D. M. Colussi, C. Y. Parisot and G. Y. Lefevre J. Clin. Pharmacol, 1998, 38, 727.
Phenprocoumon (R)	98.94	98.93	97.17	90.43	W. Schmidt and E. Jaehnchen Experientia, 1978, 34(10), 1323.
Phenprocoumon (S)	98.57	99.28	98.56	88.93	W. Schmidt and E. Jaehnchen Experientia, 1978, 34(10), 1323.
Cinoxain	94.1	64.6	80.8		T. Izumi and T. Kitagawa Chem. Pharm. Bull., 1989, 37(3), 742.
Nalidixic acid	91.9	95.7	96.9		T. Izumi and T. Kitagawa Chem. Pharm. Bull., 1989, 37(3), 742.
Pipemidic acid	23	26.6	31.7		T. Izumi and T. Kitagawa Chem. Pharm. Bull., 1989, 37(3), 742.
