# Supplementary material for: Species differences in drug plasma protein binding
Source: Royal Society of Chemistry journal article supplement (doi:10.1039/c4md00148f), 2014-01-01
Supplement: c4md00148f2.xlsx [file c4md00148f2.xlsx]

## Sheet: Sheet1
Supplementary information 1. The library contains, but is not limited to, the following types of scaffolds / ring systems: benzene, naphthalene, pyridine, pyrazine, pyrimidine, pyridazine, quinazoline, quinoline, benzimidazole, benzothiazole, imidazole, oxazole, oxadiazole, indole, thiophene, pryazole, thiazole, thiadiazole, isooxazole; and the following linkers / functional groups: alkyl, alkene…
Compound number	Rat (% free)	Human (% free)	Dog (% free)	Mouse (% free)	Molecular weight	Measured logD	Ion class	ClogP	Polar surface area	Number of hydrogen bond acceptors	Number of hydrogen bond donors	Number of rotatable bonds
1	31.5	26.42	20.81	27.43	259.35	>1.28	Base	2.75	46.2	3	2	6
2	4.905	1.88	4.8	4.73	425.89	1.543	Neutral	1.85	114	7	2	8
3	18.88	14.07	11.09	15.89	375.87	2.728	Base	3.85	42	3	1	8
4	3.335	9.89	13.3	6.29	493.61	2.5	Base	4.53	79.6	8	2	9
5	20.29	13.53	11.09	14.21	280.41	2.489	Base	5.04	1.75	2	0	5
6	6.92	7.193	7.7	2.533	450.51	2.1	Base	5.28	63.3	7	1	9
7	36.81	20.87	53.68	32.22	225.25	1.51	Neutral	1.29	58.7	5	2	1
8	7.1	6.57	10.22	6.15	279.29	2.83	Neutral	2.44	107	5	5	3
9	15.72	15.42	17.1	9.098	527.02	2.3	Base	5.96	80.8	9	1	12
10	2.1	0.36	3.26	2.7	475.98	>3.5	Base	5.06	64.1	7	1	9
11	4.2	5.41	31.09	5.77	319.76	2.68	Neutral	2.21	99.2	8	3	5
12	3.6	0.92	6.29	4.3	482.01	>3.4	Base	4.9	64.1	7	1	9
13	1.04	0.26	8.47	0.62	382.81	3.47	Neutral	2.94	109	9	3	6
14	18.3	4	25.09	17.8	462.94	2.72	Base	4.47	74.6	8	1	8
15	2.177	2.403	2.12	1.152	458.58	>3.93	Base	5.84	35.4	5	1	10
16	9.5	8.31	12.17	9.02	454.51	2.055	Neutral	1.32	134	10	2	7
17	6.8	0.8	5.3	8.8	476.97	3.21	Base	4.11	74.3	8	1	9
18	13.43	12.05	24.23	12.78	463.6	2.54	Neutral	2.34	116	8	2	10
19	2.88	6.86	0.9533	7.3	460.89	2.925	Neutral	4.05	94.7	8	2	8
20	26.63	18.31	28.42	8.3	632.79	2.2	Base	2.3	94.1	7	0	13
21	26.18	31.9	34.34	13.84	639.8	1.85	Base	3.26	112	7	0	13
22	0.79	0.42	1.5	1.7	464.52	1.5	Acid	4.86	111	8	2	11
23	0.93	0.75	2.395	2.98	468.5	1.31	Acid	4.54	120	9	2	11
24	36.22	24.12	38.25	14.39	639.83	1.355	Base	2.25	96.1	8	0	14
25	22.39	8.13	17.14	11.09	594.74	1.6	Base	2.93	87.5	8	0	11
26	1.19	1.265	4.445	4.64	454.48	0.98	Acid	4.04	120	9	2	11
27	1.37	1.645	0.94	0.705	429.6	>4.3	Neutral	4.65	41.7	3	1	3
28	1.43	1.58	1.24	2.33	314.47	3.94	Neutral	3.97	36.5	2	0	1
29	9.248	9.915	8.3	16.11	430.54	3.19	Neutral	2.91	99.3	6	2	4
30	3.01	6.29	19.91	3.33	495	2.92	Base	3.75	94.2	6	4	9
31	11.2	11.01	14.12	6.71	460.89	2.82	Neutral	4.05	94.7	8	2	8
32	65.41	69.37	67.8	59.75	417.51	1.58	Base	3.18	63.7	7	1	6
33	5	2.38	4.84	4.64	492.53		Neutral	2.34	133	10	2	9
34	0.66	0.25	0.36	0.34	493.97		Neutral	3.44	123	9	2	8
35	6.08	8.66	16.5	6.29	474.92	3.04	Neutral	4.36	94.7	8	2	8
36	13.98	3.81	10.65	9.81	478.5	2.11	Neutral	1.65	135	11	2	8
37	8.92	4.25	9.81	3.56	515.95	3.15	Base	5.47	99.9	11	1	8
38	8.56	9.03	12.03	9.02	468.43	2.1	Neutral	2.79	114	9	2	8
39	17.89	16.87	23.77	20.6	502.52	1.9	Neutral	1.5	116	10	1	11
40	7.7	5.41	9.81	8.3	482.45	2.27	Neutral	3.32	114	9	2	9
41	16.33	7.16	12.78	15.87	499.55	1.91	Neutral	1.47	154	12	2	10
42	18.42	31.81	45.08	38.34	533.53	1.16	Neutral	1.04	135	12	1	13
43	21.99	24.27	35.15	48.43	473.55		Neutral	1.73	125	10	2	9
44	30.36	35.21	45.01	41.08	475.53		Neutral	0.543	145	12	2	9
45	41.93	25.13	49.57	39.98	456.59	1.53	Base	2.32	80.8	6	3	8
46	27.17	43.12	47.01	37.58	435.53	1.69	Neutral	3.09	88.2	9	2	8
47	1.04	2.52	4.25	1.45	402.46	3.67	Base	3	96	9	2	6
48	0.47	0.95	1.625	0.42	416.49	>4	Base	3.53	96	9	2	7
49	20.09	26	33.6	24.66	453.52	2.19	Neutral	3.25	88.2	9	2	8
50	13.98	26.49	26.85	14.4	467.55	2.5	Neutral	3.55	88.2	9	2	8
51	3.93	11.57	15.87	8.84	396.47	3.01	Neutral	3.45	54.9	7	1	7
52	6.35	24.57	34.11	14.7	467.55	2.48	Neutral	3.55	88.2	9	2	8
53	8.56	18.17	32.58	22.59	467.55	2.49	Neutral	3.5	74.4	9	1	9
54	0.55	0.785	0.925	0.39	418.46	>4.2	Neutral	3.44	105	10	2	7
55	0.2	1.86	1.72	0.31	473.54	4.1	Neutral	2.7	106	11	2	9
56	5.83	6.285	23.18	7.95	450.49	1.8	Neutral	1.34	107	9	2	8
57	5.7	3.305	21.27	24.55	360.85	0.6033	Acid	0.969	105	7	2	3
58	3.01	4.71	7.87	3.18	433.47		Base	2.42	115	11	2	7
59	7.86	8.48	30.38	11.56	368.41	2.95	Neutral	2.39	78.1	7	2	5
60	0.23	0.68	0.7	2.49	527.42	0.6	Zwitterion	2.62	74.9	5	2	9
61	15.41	15	24.66	12.03	509.57	2.82	Neutral	3.87	95.8	10	1	9
62	4.02	4.21	3.267	2.98	419.45	3.01	Neutral	2.48	115	11	2	7
63	5.11	7.8	9.515	5.29	467.53		Neutral	3.75	87	9	1	7
64	0.91	1.01	0.595	4.59	420.51	1.93	Acid	5.45	107	7	3	4
65	0.52	0.34	0.51	0.11	409.83	NV	Neutral	4.38	99	8	2	6
66	1.83	3.33	6.29	3.97	442.49	2.22	Base	1.11	112	8	4	8
67	2.35	1.9	7.79	1.66	422.44	2.62	Neutral	1.07	118	10	2	7
68	6.92	3.89	31.75	5.17	452.47	1.88	Neutral	0.433	127	11	2	9
69	6.715	4.03	3.285	12.03	480.94	2.91	Base	2.59	79.2	8	2	8
70	0.76	1.18	16.82	5.89	488.37	-0.22	Acid	3.62	107	7	3	11
71	2.75	2.85	3.56	2.13	392.44	3.45	Base	2.63	86.2	7	4	4
72	1.06	0.96	3.97	6.71	488.37	-0.15	Acid	3.41	107	7	3	10
73	8.03	7.01	11.09	6.42	521.66	3.14	Base	3.74	97.6	10	2	10
74	8.56	7.96	14.69	7	443.55	1.99	Base	3.52	67.5	7	2	7
75	0.95	3.64	2.72	2.33	481	2.32	Base	3.86	127	8	3	7
76	0.6	0.52	2.55	5.06	514.41	0.33	Acid	3.95	107	7	3	10
77	13.17	9.03	11.32	6.56	281.42	2.99	Neutral	2.36	46.6	4	1	7
78	31.84	8.415	21.03	6.02	443.57	1.68	Base	2.3	89.2	9	2	8
79	12.91	23.79	28.06	38.4	502.48	2.34	Neutral	0.918	120	11	1	10
80	0.66	0.34	1.13	0.34	419.85		Neutral	4.13	49.8	5	0	6
81	5.83	6.29	9.81	7.79	355.4	3.4	Base	2.57	108	9	3	8
82	0.55	0.46	1.99	3.18	482.37	0.27	Acid	3.64	98.2	6	3	10
83	0.3	0.62	1.7	1.9	486.4	0.51	Acid	4.4	98.2	6	3	11
84	34.89	20.5	27.3	20.27	507.64	2.56	Base	2.66	97.6	10	2	10
85	0.95	1.01	1.01	0.9	526.57	>3.7	Neutral	5.51	85.5	9	1	9
86	14.25	21.83	25.52	10.01	515.6	2.65	Neutral	3.71	95.8	10	1	9
87	1.83	0.88	4.25	2.78	432.48	>3.75	Neutral	3.04	84.1	8	1	7
88	16.65	2.82	10.22	29.16	461.56	1.96	Base	2.45	89.2	9	2	8
89	2.88	22.63	21.8	14.12	485.99	3.1	Base	3.89	79.3	8	2	9
90	0.6	1.86	3.89	4.95	516.38	-0.18	Acid	3.77	116	8	3	10
91	0.89	0.75	0.92	0.4	449.55	>4	Neutral	3.46	72.9	8	1	9
92	14.82	7.63	11.09	1.29	465.55	3.25	Neutral	2.59	81.7	9	1	9
93	1.88	3.72	5.29	6.42	464.95	1.67	Base	3.07	127	8	3	5
94	0.29	0.17	0.09	4.95	471.91	-0.04	Acid	3.67	107	7	3	10
95	0.5	0.27	0.53	7.3	453.92	-0.31	Acid	3.46	107	7	3	10
96	6.77	5.65	4.25	0.45	479.58	3.39	Neutral	3.11	81.7	9	1	9
97	0.05	0.05	0.03	0.01	423.95	>3.2	Neutral	5.2	41.3	6	0	7
98	0.7633	0.94	3.02	5.925	497.95	0.08	Acid	3.8	107	7	3	10
99	0.66	0.41	1.86	5.77	479.96	0.36	Acid	4	107	7	3	10
100	10.32	10.88	16.82	6.29	465.55	3.18	Neutral	2.59	81.7	9	1	9
101	41.93	36.8	41.08	27.3	508.62	1.31	Base	2.41	96.3	10	2	12
102	11.2	15.9	10.87	9.02	451.52	2.91	Neutral	2.08	81.7	9	1	9
103	27.53	19.57	23.82	9.6	548.68	2.41	Base	3.61	82.5	10	1	13
104	2.4	1.86	2.18	0.61	574.75	3.7	Base	4.74	73.7	9	1	13
105	0.32	0.17	0.15	0.13	477.61	>3.2	Neutral	4.51	72.9	8	1	10
106	3.36	5.65	1.1	2.49	449.55	3.06	Base	3.85	79.9	8	2	10
107	3.84	53.67	63.54	10.22	423.49	1.09	Base	2.15	92.7	8	3	6
108	0.9567	0.47	0.535	0.56	516.98	>3.2	Base	5.1	54.4	8	1	10
109	13.43	11	8.5	8.3	490.61	2.993	Base	3.53	76.9	9	2	11
110	52.75	52.53	38.34	33.09	428.99	1.69	Base	2.7	79.2	8	2	7
111	42.49	46.8	34.63	34.11	425.93	1.85	Base	3.13	68.9	7	2	7
112	9.3	14.14	18.48	16.82	546.69		Base	2.61	72.3	8	1	10
113	4.1	3.81	4.74	4.54	547.67	3.6	Base	4.28	79.9	8	1	9
114	1.83	3.64	4.54	1.66	568.7	3	Base	3.86	72.3	8	1	9
115	5.83	12.54	11.32	4.34	598.72	2.7	Base	3.28	94.8	9	2	11
116	4.2	6.86	8.65	1.66	567.71	2.9	Base	5.35	72.2	8	1	10
117	2.57	3.81	1.74	1.29	497.62	3.007	Base	4.98	52.8	6	1	7
118	5.11	7.96	8.65	6.02	612.75	3.2	Base	3.24	82.1	10	1	12
119	5.95	5.18	22.19	4.84	568.7	2.6	Base	3.06	73.3	9	1	9
120	0.1	0.105	0.08	0.04	413.5	>4.3	Neutral	5.45	37.4	4	0	4
121	3.84	6.57	9.41	3.375	569.68	3.3	Base	4.93	79.9	8	1	10
122	0.52	0.31	0.43	0.5	525.67	>4.3	Base	6.08	39.4	6	0	8
123	12.4	16.52	9.6	9.02	491.94	2.85	Base	3.78	78	8	2	9
124	10.32	14.14	10.65	7.62	331.82	2.9	Neutral	3.38	24	3	0	4
125	34.89	33.15	20.65	19.91	455.52	2.26	Base	3.97	68.9	7	2	8
126	8.027	11.11	9.6	12.94	536.07	1.698	Base	2.87	115	9	2	9
127	0.6033	0.52	1.74	1.62	419.59	2.18	Acid	4.54	84.8	6	2	12
128	1.765	0.8233	2.29	2.72	419.59	2.19	Acid	4.54	84.8	6	2	12
129	59.51	54.81	60.3	48.43	467.61	1.4	Base	2.2	85.5	9	1	10
130	4.79	4.54	4.25	3.97	535.69	3.47	Base	3.7	97.6	10	2	10
131	19	5.23	27	19.54	389.46	2.46	Neutral	2.24	117	7	5	7
132	0.32	0.34	1.86	3.97	492.43	0.78	Acid	4.01	98.2	6	3	10
133	16.91	16.7	22.39	21.8	420.51	2.7	Neutral	1.83	94.1	7	2	8
134	0.175	0.11	0.2	1.94	459.95		Acid	3.2	107	7	3	10
135	10.32	4.27	9.92	7.95	420.51	3.09	Neutral	2.87	132	8	6	7
136	4.02	2.23	8.12	7.62	387.5	0.64	Acid	4.06	87.1	6	2	9
137	12.4	14.71	16.5	20.65	547.7	2.48	Base	3.54	97.6	10	2	8
138	7.86	5.9	6.42	6.42	486.58	3.235	Base	3.6	81.5	10	2	10
139	5.23	2.98	8.3	8.84	487.66	1.08	Acid	3.08	107	7	3	10
140	6.49	11.57	10.43	5.4	478.55	2.82	Neutral	2.32	105	10	2	9
141	3.29	2.38	10.22	38.34	489.36	<0.5	Acid	2.49	118	8	3	10
142	0.05	0.32	0.21	0.26	574.12	2.92	Base	6.16	114	9	2	10
143	2.15	0.29	1.94	2.13	468.94	NV	Neutral	4.6	100	9	3	9
144	3.97	5.565	6.01	5.485	435.53	1.8	Base	3.39	93.3	8	3	10
145	0.33	0.15	0.42	1.94	485.99		Acid	3.75	107	7	3	10
146	3.84	3.02	5.64	4.34	491.55	3.29	Neutral	3.62	117	10	2	10
147	37.54	21.83	48.43	42.19	381.41		Neutral	0.012	87.4	6	2	5
148	38.43	16.33	34.12	34.37	395.43	1.697	Neutral	0.728	73.6	6	1	6
149	3.68	5.18	2.08	2.28	491.59	3.44	Base	3.25	87.2	10	2	11
150	13.17	12.55	6.15	5.77	504.63	3.303	Base	3.58	76.9	9	2	12
151	0.67	0.61	0.78	0.46	409.5	3.928	Base	3.06	87.5	7	4	5
152	0.46	0.19	1.82	5.06	451.59	0.915	Acid	4.29	98.2	6	3	10
153	0.27	0.31	0.94	4.84	475.97	0.46	Acid	3.86	98.2	6	3	10
154	7.54	14.14	19.91	9.6	357.39		Base	2.92	95.2	8	3	7
155	13.98	12.3	14.12	5.29	462.55	3.16	Neutral	2.47	82.9	9	1	8
156	1.46	0.15	1.7	9.6	442.54	<0.5	Acid	3.08	122	8	3	10
157	6.77	13.06	31.09	4.84	561.7	2.77	Base	4.23	88.5	9	2	7
158	58.96	26.68	42.19	44.44	463.51	0.9	Base	1.91	85.2	8	1	7
159	0.09	0.29	0.23	0.27	601.15	2.59	Base	4.09	115	10	2	10
160	1.333	1.55	2.49	2.72	413.54	1.26	Acid	4.47	87.1	6	2	9
161	8.485	5.18	6.42	18.48	412.42	1.155	Acid	2.47	93.6	8	2	7
162	0.5567	0.325	1.235	2.95	502.01	1.14	Acid	4.41	98.2	6	3	10
163	1.427	0.07333	1.63	6.91	468.58	1.3	Acid	3.62	122	8	3	10
164	0.34	0.33	1.255	2.98	518.46	1.66	Acid	4.56	98.2	6	3	10
165	1.293	1.41	1.98	3.48	421.54	1.01	Acid	6.06	87.1	6	2	5
166	4.1	3.12	5.29	4.15	374.45	3.3	Base	2.01	72.5	7	2	5
167	17.63	6.71	15.27	16.5	507.5	2.63	Base	2.21	130	10	3	7
168	1.675	1.11	1.465	2.28	427.57	2.14	Acid	4.36	84.8	6	2	5
169	0.81	0.86	0.78	0.82	441.59	2.61	Acid	4.89	84.8	6	2	6
170	52.75	38.95	38.88	54.14	454.57	1.85	Neutral	2.56	90.1	8	1	11
171	15.72	12.8	13.84	9.81	534.66	2.8	Base	3.36	85.7	10	2	14
172	1.31	0.98	2.08	2.13	425.55	1.5	Acid	5.2	87.1	6	2	6
173	3.36	1.78	4.95	4.54	411.52	1.2	Acid	4.67	87.1	6	2	5
174	0.1	0.05	0.09	0.29	605.18	3.06	Base	3.36	116	10	2	11
175	0.54	1.35	1.29	1.21	602.14	2.015	Base	3.04	128	11	2	10
176	0.35	3.98	0.78	0.6	621.18	1.65	Base	2.54	124	11	2	12
177	0.2375	1.045	2.23	2.22	473.43	2.15	Acid	3.96	140	10	3	10
178	1.06	0.84	1.21	3.89	475.86	2.35	Acid	3.98	140	10	3	9
179	22.92	11.54	24.03	22.62	409.46	2.2	Neutral	1.12	73.6	6	1	7
180	11.67	6.86	8.84	10.65	435.5	2.7	Neutral	1.56	73.6	6	1	8
181	3.68	10.45	9.41	2.6	630.16	1.28	Base	2.17	161	12	2	10
182	29.88	42.27	43.32	34.11	491.63	1.78	Neutral	-0.591	118	9	3	11
183	21.99	37.87	28.69	25.96	457.55		Neutral	0.261	114	9	2	8
184	0.2	3.33	1.59	0.9	578.11	2.29	Base	2.84	123	10	2	9
185	6.18	2.55	2.82	11.31	430.41		Acid	2.75	93.6	8	2	7
186	2.75	3.26	2.33	1.29	483.59	NV	Base	4.89	66.2	6	2	6
187	2.355	4.69	2.75	15.9	367.45	0.9	Acid	3.5	108	6	3	7
188	0.22	1.66	1.24	0.98	559.07	2.5	Base	3.34	127	10	2	7
189	1.06	0.56	0.78	1.59	419.95	2.4	Acid	5.62	82.8	5	2	7
190	0.62	3.225	4.8	0.605	463.58	2.4	Base	4.43	93.3	8	3	10
191	0.35	2.44	0.9	0.39	606.17	2.3	Base	2.38	126	11	2	11
192	1.57	3.447	4.52	2.625	463.58	3.1	Base	4.5	79.9	8	2	11
193	16.92	10.75	15.79	8.36	410.4	2.7	Neutral	1.58	77.7	8	2	8
194	5.83	4.64	4.74	3.04	374.45	2.2	Base	1.53	85.9	7	3	5
195	0.19	1.39	0.64	0.625	563.1	2.8	Base	2.68	125	10	2	8
196	4.895	3.05	4.54	2.78	388.47	3.4	Base	1.98	72.5	7	2	5
197	8.115	7.635	6.78	9.91	458.49	3	Base	2.64	60.3	7	0	9
198	1.125	2.76	6.198	1.837	463.58	3.3	Base	4.37	79.9	8	2	10
199	1.57	0.41	0.32	3.26	448.54	3.267	Neutral	2.53	95.5	9	0	8
200	6.49	3.195	3.56	5.29	533.65	3.7	Neutral	2.58	114	9	2	9
201	14.25	11.57	9.41	14.12	537.64	2.8	Neutral	1.37	137	10	3	10
202	0.52	1.32	1.31	0.8	564.13	2.9	Base	3.87	115	9	2	10
203	4.292	7.96	9.02	5.64	387.45	2.8	Neutral	2.55	90.1	8	2	5
204	2.735	12.3	16.18	13.57	370.84	2.9	Neutral	4.08	84.8	7	3	5
205	7.7	2.66	5.17	8.65	428.53	2.4	Neutral	2.6	87.4	9	0	9
206	24.02	16.08	20.89	25.09	426.56	2.8	Neutral	1.43	85.6	7	2	6
207	6.63	11.34	9.6	6.85	486.68	3.2	Neutral	3.15	86	7	2	8
208	1.31	1.21	1.27	0.57	549.53	NV	Base	4.98	86.9	7	1	13
209	0.36	1.32	2.08	1.59	350.4	2.2	Acid	2.76	108	6	3	4
210	7.7	11.57	15.17	6.29	485.65	2.2	Base	4.63	99.7	8	2	13
211	4.48	2.98	2.13	3.97	361.46	3.5	Neutral	3.34	78.6	6	0	7
212	9.01	5.9	8.3	2.85	404.47	1.7	Base	1.06	94.7	8	3	7
213	1.75	0.64	1.69	3.33	478.54	3.4	Neutral	3.3	95.2	9	0	7
214	20.46	7.8	14.98	9.6	404.47	2.43	Base	0.668	95	8	3	6
215	7.22	5.18	5.29	3.33	410.56	3.8	Neutral	3.05	90.2	6	3	6
216	9.11	7.42	14.33	18.48	479.58	2.367	Base	2.5	81.6	9	1	10
217	4.48	5.763	5.77	6.15	513.64	3.3	Base	2.63	97.2	10	1	8
218	23.61	16.69	18.14	26.4	431.56	2.4	Neutral	0.607	104	8	4	10
219	20.09	19.21	17.8	10.87	382.51	3.1	Neutral	1.94	90.2	6	3	5
220	32.34	34.69	28.69	34.95	426.56	2.4	Neutral	1.98	99	7	3	7
221	35.48	38.35	38.02	29.52	426.56	2.4	Neutral	1.98	99	7	3	7
222	29.4	12.3	16.18	7.3	396.53	3.1	Neutral	2.5	90.2	6	3	5
223	7.7	4.96	2.78	5.17	476.48	3.3	Base	2.93	60.3	7	0	9
224	1.41	2.55	3.11	1.48	573.1	2.7	Base	3.84	127	10	2	7
225	14.54	13.86	22.99	16.55	434.42	2.7	Neutral	4.23	93.9	8	3	7
226	10.98	26.45	47.32	5.06	460.51	1.2	Neutral	1.61	134	10	2	9
227	27.08	14.42	15.87	16.79	473.37	2.8	Base	1.33	119	8	5	8
228	5.7	29.69	46.72	1.94	460.51	1.2	Neutral	0.806	134	10	2	9
229	16.34	22.23	41.08	19.55	422.46		Neutral	2.63	84.3	7	1	6
230	8.205	13.06	25.09	16.51	434.47	1.7	Neutral	2.22	84.3	7	1	5
231	6.49	2.18	5.17	4.06	476.53	3.2	Neutral	0.626	122	10	3	8
232	34.37	20.31	27.3	34.11	420.49	2.1	Base	2.43	66	6	1	5
233	14.54	7.8	12.53	12.78	431.41	2.6	Neutral	1.03	73.6	6	1	7
234	13.43	8.48	17.14	15.87	421.47	2.7	Neutral	1.36	73.6	6	1	8
235	4.48	3.64	4.04	2.33	665.66	4.3	Base	7.37	94.8	8	2	13
236	2.69	1.99	2.66	1.24	582.73	3.5	Base	3.24	73.3	9	1	10
237	2.46	1.03	2.28	0.92	596.75	3.8	Base	3.77	73.3	9	1	11
238	2.1	1.45	3.64	1.26	527.65	3.3	Base	4.14	72.2	8	1	8
239	8.87	7.015	7.03	8.42	569.68	3.3	Base	4	67.6	9	0	9
240	9.687	12.37	11.5	9.72	519.57	2.5	Base	2.38	67.3	9	0	10
241	1.71	1.29	1.9	1.9	299.35	2.83	Neutral	2.07	56.9	5	0	3
242	0.5675	8.58	0.77	1.327	473.98	2.4	Base	3.79	86.5	8	2	7
243	0.5633	0.48	0.775	0.2875	419.94	3.767	Base	3.08	77.7	7	2	5
244	6.92	20.31	7.62	4.15	463.99	2.5	Base	3.1	86.5	8	2	7
245	5.335	5.985	5.105	9.185	569.68	3.3	Base	4.8	66.5	8	0	9
246	4.79	5.9	2.55	2.03	477.97	2.7	Neutral	1.38	105	9	2	6
247	22.39	23.08	14.98	15.27	500.55	2.2	Base	1.88	86.7	9	2	10
248	0.72	0.5467	0.64	0.44	511.6	>4.3	Base	3.95	97.9	7	3	6
249	4.2	1.15	1.19	1.7	469.53	3.2	Neutral	1.78	107	9	0	8
250	2.983	4.47	4.79	4.6	433.92	2.9	Neutral	1.82	96	8	2	3
251	2.3	0.33	0.57	1.94	477.52	3	Neutral	2.26	108	10	0	7
252	0.52	0.9	1.21	0.14	463.99	3.5	Base	2.82	100	8	3	7
253	0.48	1.48	2.22	2.91	395.84	0.5	Acid	3.4	108	6	3	5
254	2.3	0.77	0.92	1.26	482.99	3.25	Base	5.31	90.2	8	2	5
255	0.8567	8.66	13.57	4.05	420.39	2.8	Neutral	3.99	96.8	8	3	7
256	11.91	14.71	17.47	15.68	434.42	3	Neutral	4.23	93.9	8	3	7
257	5.7	6.57	9.17	11.38	429.53	2.9	Base	3.63	56.4	8	1	7
258	0.26	3.64	0.68	0.12	488.01	2.4	Base	3.93	86.5	8	2	8
259	1.225	2.62	1.62	0.395	491.01	2.9	Base	2.39	97.1	9	2	7
260	0.93	1.7	4.34	7.46	375.43	0.4	Acid	3.14	108	6	3	5
261	0.715	1.63	1.49	1.32	463.99	2.8	Base	3.52	86.5	8	2	6
262	0.22	0.27	0.92	1.08	430.29	1	Acid	3.87	108	6	3	5
263	0.125	1.627	0.135	0.295	502.04	3.3	Base	4.82	86.5	8	2	7
264	2.05	9.42	7.3	2.43	336.39	2.6	Neutral	1.52	74.7	6	1	7
265	0.46	1.19	1.58	0.91	712.87	3.6	Base	3.67	156	12	3	13
266	0.5	2.03	2.43	3.04	397.38	0.2	Acid	3.23	108	6	3	5
267	0.235	0.305	0.21	0.36	448.89	2.6	Neutral	3.14	115	10	2	6
268	7.15	8.48	9.81	11.32	282.3	2.7	Neutral	1.68	87.2	6	2	2
269	2.05	1.52	1.18	3.89	462.57	3.6	Neutral	3.05	95.5	9	0	8
270	21.6	13.06	32.58	12.03	451.55	2.9	Base	4.17	97	8	4	8
271	0.54	1.03	1.99	3.97	393.42	0.9	Acid	3.39	108	6	3	5
272	0.29	0.37	0.61	1.38	423.9	1.6	Acid	4.11	108	6	3	5
273	3.93	0.78	0.49	2.22	466.53	3.6	Neutral	2.8	95.5	9	0	8
274	9.565	13.45	15.19	15.96	276.32	2.1	Neutral	1.4	97.9	6	2	3
275	4.17	12.4	4.09	3.26	583.71	3.7	Base	4.46	67.6	9	0	9
276	19.37	9.35	13.49	9.07	422.92		Base	2.8	76.2	8	2	6
277	0.72	1.1	4.25	7.15	389.45	0.8	Acid	3.59	108	6	3	5
278	17.76	9.115	11.99	10.76	494.98	2.9	Neutral	2.37	104	10	2	7
279	5	3.98	2.66	5.17	359.45	3.2	Neutral	2.33	78.6	6	0	6
280	2.115	5.235	5.735	2.425	449.55	2.1	Base	3.91	93.3	8	3	10
281	15.2	9.22	12.28	14.3	412.51	2.7	Neutral	0.964	80.9	7	1	6
282	4.03	1.2	2.62	0.45	459.96	3.54	Neutral	2.32	96	8	2	4
283	14.25	17.49	19.47	20.72	399.29	1.95	Base	2.59	76.5	6	3	3
284	0.43	6.43	1.45	0.94	548.09	2.8	Base	3.81	114	9	2	6
285	0.22	0.51	0.98	1.82	409.87	1.2	Acid	3.71	108	6	3	5
286	0.59	0.77	1.035	2.54	409.87	1.1	Acid	3.71	108	6	3	5
287	23.11	21.06	34.12	21.28	439.49	2.3	Neutral	0.721	72.2	8	1	7
288	2.865	12.79	24.12	12.65	450.42	2.55	Neutral	3.94	106	9	3	8
289	3.93	5.07	3.07	4.44	385.47	3.8	Neutral	3.19	69	8	0	7
290	0.43	0.6925	0.7233	0.46	482.99	3.6	Base	4.12	96.4	8	2	7
291	0.44	0.64	1.26	1.99	430.29	0.8	Acid	4.12	108	6	3	5
292	6.27	1.9	1.85	7	455.58	3.1	Neutral	2.28	97.4	10	0	9
293	0.62	5.9	1.38	0.55	488.01	2.85	Base	3.84	86.5	8	2	8
294	2.46	5.85	2.34	4.64	488.01	2.7	Base	4.31	86.5	8	2	7
295	0.32	0.35	6.71	1.1	435.91	1.7	Acid	4.31	108	6	3	5
296	0.3433	0.695	1.348	1.877	427.86	1	Acid	3.86	108	6	3	5
297	0.63	1.29	0.35	1.18	435.87	NV	Neutral	3.34	122	8	3	5
298	9.9	4.64	4.63	4.92	422.38	3.8	Neutral	4.5	84.8	7	3	6
299	3.84	1.62	1.55	0.44	488.01	>3.9	Base	4.59	86.8	8	2	7
300	0.36	1.18	1.94	2.22	409.87	1	Acid	3.85	108	6	3	5
301	4.445	4.375	12.35	10.13	438.38	2.8	Neutral	4.17	96.8	8	3	7
302	4.11	3.2	4.86	5.39	281.29	3.09	Neutral	2.18	51.8	4	1	2
303	10.36	10.15	12.14	6.72	486.58	1.95	Base	3.31	91.9	10	2	9
304	10.62	6.25	6.65	12.09	238.29	3.1	Neutral	3.23	38.1	3	0	3
305	7.75	4.26	16.63	29.27	287.34	2	Neutral	1.96	80.7	5	1	3
306	3.14	1.59	3.13	1.55	369.4	>4.175	Neutral	2.6	52.7	7	0	7
307	1.75	0.7	0.38	1.99	502.51	3.6	Neutral	2.92	95.5	9	0	9
308	13.13	15.08	21.7	16.65	306.35	1.9	Neutral	0.984	107	7	2	4
309	1.76	2.85	3.28	5.19	410.48	3.333	Neutral	2.96	87.7	9	0	8
310	29.22	15.62	22.07	21.87	413.5	2.7	Neutral	0.131	91.1	8	1	6
311	2.71	2.06	2.53	3.66	436.39	3.2	Neutral	2.31	87.7	9	0	9
312	3	3.62	12.43	14.31	368.43	NV	Acid	4.32	102	6	2	7
313	50.35	49.56	49.57	49.57	412.53	1.8	Neutral	1.43	99	7	3	6
314	1.23	1.14	1.29	1.59	472.57	3.6	Neutral	2.35	102	10	0	9
315	50.93	49.56	49.57	45.38	412.53	2	Neutral	1.43	99	7	3	6
316	1.84	1.25	1.965	1.905	420.48	3.3	Neutral	2.27	93.9	10	0	9
317	13.7	13.81	19.69	13.36	457.48	2.7	Neutral	0.9	72.2	8	1	7
318	54.25	50.46	51.4	44.06	469.51	1.7	Neutral	0.423	94.7	9	2	9
319	33.53	26.75	32.62	32.36	513.54	2.2	Neutral	0.006	94.7	9	2	9
320	6.17	2.15	2.43	4.59	469.6	3.5	Neutral	2.8	97.4	10	0	9
321	2.98	1.21	1.66	2.88	509.55	3.7	Neutral	2.67	97.4	10	0	10
322	13.29	11.11	13.21	18.36	480.59	2.1	Neutral	1.6	116	11	0	10
323	0.06	0.24	0.05	0.07	544.07	4.2	Base	4.74	95.3	9	2	9
324	1.38	0.95	1.19	1.48	432.36	3.5	Neutral	1.46	93.9	10	0	9
325	29.44	20.25	29.06	27.82	471.01	1.9	Base	2.16	85.6	9	2	9
326	0.2	1.58	0.36	0.12	601.17		Base	5.48	96.4	10	2	12
327	1.9	2.01	2.43	2.83	472.57	3.05	Neutral	2.35	102	10	0	9
328	0.25	0.1	0.4033	0.37	459.96	2.5	Base	2.83	98.2	9	2	6
329	2.63	1.38	3.11	5.12	432.36	2.925	Neutral	1.46	93.9	10	0	9
330	21.61	21.76	14.4	12.2	415.92		Base	2.03	94.7	7	4	9
331	11.83	18.72	31.11	15.61	457.48	2.3	Neutral	1.67	71.1	7	1	7
332	13.31	24.24	31.06	26.21	458.46	2.2	Neutral	2.19	65.9	7	0	7
333	8.97	2.15	13.13	4.36	442.54	3.3	Neutral	1.07	91.7	9	1	7
334	43.45	38.91	55.67	48.01	414.55	2	Neutral	1.69	113	7	4	7
335	0.29	0.18	0.47	0.08	582.13	3.4	Base	4.91	120	10	3	11
336	0.22	0.49	1.66	0.11	626.18	2.8	Base	4.91	129	11	3	12
337	7.22	3.15	6.42	1.23	579.08	2.1	Base	4.6	133	11	3	10
338	3.22	0.96	21.23	0.21	612.15	2.7	Base	4.39	129	11	3	12
339	7.64	11.47	11.89	5.74	407.48	2.5	Base	3.24	83.9	6	3	3
340	0.18	0.18	0.16	0.15	587.12	2.983	Base	3.11	133	10	2	9
341	0.87	0.14	0.2	0.06	583.11	>4.25	Base	5.43	114	10	2	12
342	0.92	0.6833	0.7833	1.16	446.39	3.95	Neutral	1.98	93.9	10	0	9
343	14.33	8.01	15.6	20.58	421.47	2.5	Neutral	1.17	73.6	6	1	7
344	0.3	0.33	0.95	0.33	582.13	3.5	Base	3.36	106	10	2	12
345	8.82	4.69	11.39	11.78	418.4	2	Neutral	1.49	87.7	9	0	10
346	12.91	2.01	4.04	0.09	587.14	NV	Base	4.88	110	10	3	11
347	0.16	0.1	0.2	0.06	525.03	>4.25	Base	4.35	105	9	2	8
348	5.63	16.86	1.1	49.21	396.45	-0.5	Acid	2.62	117	8	3	7
349	5.08	3.21	7.01	9.37	422.37	3	Neutral	2	87.7	9	0	9
350	2.14	0.97	2.58	3.8	446.39	3.1	Neutral	1.98	93.9	10	0	9
351	1.23	0.38	0.48	3.65	502.51	3.6	Neutral	2.92	95.5	9	0	9
352	0.6	0.69	1.02	0.555	486.96	3.4	Base	3.69	96.4	8	2	6
353	1.6	3.43	1.41	1.06	516.98	2.6	Base	3.43	105	9	2	8
354	0.15	0.2	0.28	0.13	500.98	3.9	Base	4.25	96.4	8	2	7
355	0.29	2.02	0.75	1.42	506	3.1	Base	4.44	86.5	8	2	7
356	3.8	2.15	3.85	4.57	466.39	3	Neutral	2.63	87.7	9	0	8
357	2.46	1.02	1.41	8.43	486.96	3.2	Base	4.94	90.2	8	2	5
358	0.15	0.24	0.37	1.24	462.92	3.3	Neutral	3.66	115	10	2	6
359	3.72	2.17	2.05	2.65	479.6	3.4	Neutral	2.1	104	11	0	10
360	0.21	0.83	1.03	0.4	573.1	2.8	Base	2.55	133	10	2	8
361	1.88	3.17	2.6	1.36	603.12	2.1	Base	2.29	142	11	2	10
362	1.23	0.66	0.96	0.95	490.36	3.7	Neutral	2.67	87.7	9	0	10
363	0.02	0.07	0.2	0.32	443.87	3.1	Neutral	2.83	125	10	2	5
364	41.52	26.89	33.58	25.24	457.47	1.9	Neutral	1.6	71.1	7	1	7
365	1.5	2.03	1.93	2.24	573.1	2.6	Base	3.84	127	10	2	7
366	0.63	0.5	0.63	0.21	511	4	Base	3.79	105	9	2	7
367	0.04	0.18	0.22	0.09	617.15	3.4	Base	3.71	142	11	2	12
368	0.17	1.01	1.94	1.44	484.97	1.8	Base	2.26	117	10	2	7
369	68.02	30.07	9.45	50.57	452.48	0.9	Neutral	0.865	107	8	2	7
370	0.51	0.62	0.74	0.25	630.19	2.8	Base	2.81	134	11	2	12
371	18.58	6.29	19.59	6.19	472.57	2.6	Neutral	0.304	114	10	2	9
372	24.44	3.63	3.62	0.43	546.14	3	Base	2.61	80	9	2	11
373	4.43	1.95	5.13	10.76	436.39	3	Neutral	2.52	87.7	9	0	9
374	16.9	16.11	23.87	30.66	436.47	2.1	Neutral	2.26	96.4	10	0	6
375	2.39	2.34	2.61	4.16	432.49	3.4	Neutral	2.06	93.9	10	0	7
376	2.44	2.01	2.93	4.04	480.42	2.9	Neutral	3.15	87.7	9	0	8
377	0.5	0.41	0.32	0.43	236.32	4.1	Neutral	4.44	28.9	2	0	3
378	18.29	20.01	38.42	38.21	272.33	1.73	Neutral	1.47	65.7	4	0	3
379	9.53	12.54	23.45	12.44	287.34	2.47	Neutral	2.01	81	5	1	3
380	6.24	3.49	8.69	9.05	327.41	2.733	Neutral	2.85	67.6	5	0	4
381	4.63	1.75	5.28	4.73	329.42	>2.6	Neutral	3.27	67.6	5	0	5
382	4.16	1.04	3.69	12.07	316.38	2.6	Neutral	2.25	82.7	6	1	3
383	3.53	3.25	3.59	3.98	250.3	3.327	Neutral	3.57	38.1	3	0	3
384	7.16	7.81	14	6.97	301.37	2.48	Neutral	2.53	81	5	1	4
385	4.33	1.81	7.41	16.77	313.38	2.6	Neutral	2.54	80.7	5	1	4
386	25.5	31.98	48.63	32.93	284.34	1.71	Neutral	0.834	65.7	4	0	2
387	4.47	2.68	3.07	3.54	539.55	3.1	Neutral	2.99	97.4	10	0	9
388	4.73	2.92	7.23	8.06	478.43	2.5	Neutral	3.33	96.4	10	0	9
389	3.08	2.1	3.28	4.15	428.4	2.85	Neutral	1.26	93.9	10	0	9
390	2.72	1.775	3.41	4.22	420.48	3.1	Neutral	2.27	93.9	10	0	9
391	28.57	6.31	46	39.54	490.58	2.2	Base	3.62	63	8	0	8
392	0.76	0.35	0.5	0.58	476.97	4.1	Base	4.58	91.3	8	3	8
393	13.05	21.08	17.11	14.06	429.32	1.8	Base	2.51	85.6	7	3	4
394	2.11	1.71	2.93	2.66	418.46	3.1	Neutral	1.78	93.9	10	0	9
395	19.53	11.61	16.37	10.33	471.5	2.4	Neutral	2.48	57.7	7	0	7
396	2.01	1.22	1.32	1.04	361.43	3.7	Neutral	3.98	72.3	6	1	4
397	8.18	6.935	11.53	5.65	406.39	2.6	Base	2.78	76.5	6	3	4
398	28.13	27.31	43.81	28.39	475.47	2.3	Neutral	1.78	71.1	7	1	7
399	51.82	48.55	55.71	47.12	347.39	1.7	Neutral	1.09	99.3	7	1	5
400	19.11	19.82	23.98	17.43	317.37	1.8	Neutral	1.62	90.1	6	1	4
401	0.91	1.765	2.29	1.96	444.94	3.5	Neutral	2.8	119	7	3	5
402	0.725	1.95	4.64	2.89	408.89	3.3	Neutral	2.94	99.6	6	3	5
403	0.22	0.1	0.42	0.13	448.55	4.2	Neutral	3.14	80.4	9	0	9
404	3.93	2.05	2.69	1.74	494.98	3.9	Base	4.24	87.6	9	2	10
405	6.35	4.61	7.94	6.2	484.49	2.8	Neutral	3.36	107	12	0	8
406	22.02	27.74	22.49	17.43	362.48	1.9	Base	3	76.5	6	3	4
407	4.35	2.575	3.26	3.065	548.51	3	Neutral	3.69	104	10	0	9
408	4.17	7.07	1.56	3.97	502.04	2.9	Base	4.82	86.5	8	2	7
409	30.34	4.43	21.51	7.4	428.56	2.9	Neutral	1.55	73.3	8	1	7
410	5.22	1.76	2.45	3.21	505.52	3.2	Neutral	1.81	104	11	0	10
411	6.31	3.035	3.63	3	331.3	3.333	Neutral	3.09	39.8	4	0	4
412	70.87	20.96	54.75	53.97	412.52	1.876	Neutral	0.588	107	8	2	6
413	9.69	4.147	11.48	12.3	446.39	2.7	Neutral	1.25	93.1	10	0	9
414	4.92	2.55	3.54	3.4	331.3	3.6	Neutral	3.29	39.8	4	0	4
415	7.7	4.93	6.06	4.88	331.3	3.44	Neutral	3.16	39.8	4	0	4
416	23.68	12.39	29.45	20.46	397.44	2.6	Neutral	2.28	96.8	8	2	7
417	4.13	2.24	3.4	3.44	309.34	3.6	Neutral	3.58	39.8	4	0	4
418	17.97	9.43	26.35	22.37	415.43	2.7	Neutral	2.42	96.8	8	2	7
419	30.84	4.34	31.85	14.57	441.56	2.3	Neutral	1.52	107	9	2	7
420	1.17	0.84	1.84	1.22	477.95	3.6	Base	3.82	90.7	9	2	8
421	4.42	4.34	7.17	7.25	436.47	2.9	Neutral	1.18	103	11	0	10
422	2.36	1.42	1.81	2.09	538.46	3.7	Neutral	4.23	107	12	0	9
423	8.92	5.23	5.23	3.6	513.02	2.6	Base	3.54	106	9	2	8
424	22.05	23.2	13.1	8.26	320.37	2.57	Neutral	1.51	107	7	2	5
425	14.36	12.23	24.03	11.88	473.94	1.8	Neutral	1.91	129	9	3	5
426	3.19	1.51	3.66	2.82	450.42	3.4	Neutral	2.83	87.7	9	0	9
427	13.14	19.88	39.24	10.81	273.32	1.61	Neutral	1.37	81	5	1	3
428	29.79	16.68	23.2	14.94	501.53	2.1	Neutral	2.18	80.2	8	1	9
429	8.65	7.09	11.43	13.07	420.48	2.6	Neutral	1.45	93.1	10	0	9
430	10.86	6.17	7.86	4.15	513.02	2.7	Base	4.17	106	9	2	7
431	1.25	1.47	0.85	0.7	448.96	2.692	Base	4.08	86.4	7	4	7
432	12	4.16	13.82	8.97	516.02	2.15	Base	3.86	95.6	9	2	6
433	2.02	0.77	1.67	1.75	463.39	3.8	Neutral	2.56	82.8	9	0	9
434	5.36	3.43	4.005	6.09	516.47	3	Neutral	1.61	101	10	0	9
435	16.65	8.25	3.93	7	518.04	2.5	Base	4.29	95.6	9	2	8
436	1.71	2.82	2.06	1.9	498.99	3.4	Base	4.81	99.3	9	2	7
437	1.05	2.56	8.05	16.59	329.33	1.545	Neutral	1.57	71.1	6	1	4
438	3.48	1.82	3.07	3.11	506.42	3.6	Neutral	2.15	104	12	0	9
439	21.05	42.34	29.58	19.79	305.36	2.165	Neutral	1.09	91.7	6	1	5
440	5.94	6.06	9.04	6.94	436.47	2.8	Neutral	1.18	103	11	0	10
441	4.62	16.07	20.3	12.83	498.97	1.9	Base	2.21	106	10	2	7
442	10.81	6.99	7.25	8.58	356.35	2.83	Neutral	1.96	107	7	2	6
443	15.27	9.1	8.31	15.06	443.38	2.5	Base	2.93	137	8	5	6
444	4.73	5.98	13.82	6.34	414.9	3.6	Neutral	4.57	96.8	8	3	7
445	46.3	6.74	34.94	13.57	441.56	2.1	Neutral	1.52	107	9	2	7
446	68.43	27.55	43.76	45.26	412.52	1.8	Neutral	0.588	107	8	2	6
447	5.02	1.495	5.37	1.34	303.34	2.73	Neutral	2.12	90.1	6	1	4
448	2.02	0.42	0.85	0.6	331.39	3.1	Neutral	2.96	90.1	6	1	5
449	11.95	5.07	11.92	10.01	382.39	>3.8	Neutral	1.85	93.6	7	1	5
450	5.29	3.2	4.76	6.24	530.5	2.9	Neutral	1.25	101	10	0	10
451	0.92	0.84	1.63	0.27	456.56	3.7	Neutral	3.19	90.6	8	0	9
452	3.915	8.04	10.94	12.66	350.35	2.8	Neutral	2.93	76.4	6	2	3
453	1.2	1.26	1.16	1.26	510.02	3.8	Base	4.81	96.2	8	2	7
454	3.98	4.237	4.125	6.715	562.54	2.9	Neutral	3.33	104	10	0	10
455	2.15	1.24	4.31	0.57	513.02	3.5	Base	4.2	99.6	9	2	7
456	20.95	13.25	10.53	9.52	483.54	3.1	Base	3.6	85.2	9	2	12
457	2.04	0.7	1.41	1.78	502.02	3.3	Base	4.12	96.2	8	2	6
458	10.88	7.17	6.36	7.01	391.82	2.5	Neutral	2.93	95.1	7	2	4
459	24.3	13.98	24.54	18.98	336.45	2.6	Neutral	2.28	74.8	5	2	4
460	2.21	1.8	4.57	1.22	519.61	3.8	Base	3.51	106	10	3	8
461	6.09	2.53	4.38	4.16	504.58	3.1	Neutral	2.21	101	10	0	9
462	8.66	4.16	5.51	6.41	498.48	2.8	Neutral	1.34	101	10	0	9
463	2.75	2.51	5.54	3.85	362.31	3.6	Neutral	2.55	62.1	6	0	5
464	3.47	0.59	0.43	1.32	359.35	>4.25	Neutral	4.09	39.8	4	0	4
465	8.17	7.025	8.32	6.525	346.31	3.2	Neutral	2.62	50.1	5	0	4
466	1.2	0.72	0.81	0.9	516.47	3.7	Neutral	2.33	102	10	0	9
467	11.86	4.25	8.6	7.4	512.51	2.6	Neutral	1.11	101	10	0	10
468	1.29	0.83	2.5	2.92	490.56	3.4	Neutral	2.62	102	10	0	9
469	3.26	0.66	3.36	4.89	470.41	2.8	Neutral	1.99	102	10	0	10
470	13.83	6.92	22.68	26.61	446.52	1.7	Base	1.29	109	11	2	7
471	2.43	1.82	3.41	3.87	520.58	2.8	Neutral	1.18	111	11	0	11
472	1.485	0.51	1.578	1.19	530.5	3.567	Neutral	1.98	102	10	0	10
473	1.79	1.44	1.29	0.43	345.32	4	Neutral	3.59	39.8	4	0	4
474	3.165	2.26	2.37	2.54	362.37	3.4	Neutral	4.24	42.8	3	1	4
475	3.11	1.37	5.5	5.36	528.55	3.1	Neutral	2.02	95.5	9	0	9
476	5.57	4.78	3.6	4.125	411.39	3.7	Neutral	3.21	59.4	6	0	6
477	6.91	2.8	5.29	5.9	479.53	3.2	Neutral	1.18	114	10	0	9
478	3.41	1.27	2.01	2.41	479.53	3.3	Neutral	1.18	114	10	0	9
479	0.56	0.78	0.74	1.01	412.37	>3.64	Neutral	3.28	67.6	6	0	8
480	2.07	0.64	1.58	1.48	532.47	3.7	Neutral	2.38	111	11	0	9
481	24.79	0.9	36.42	11.76	443.57	2.2	Neutral	1.89	107	9	2	7
482	28.38	5.22	36.56	13.86	443.57	2.2	Neutral	1.89	107	9	2	7
483	1.65	0.7	0.95	4.13	564.51	3.7	Neutral	4.46	114	11	0	9
484	1.73	1.52	0.63	1.14	421.35	4.1	Neutral	3.41	57.7	6	0	7
485	30.35	11.42	22.67	21.58	453.51	2.4	Neutral	2.49	57.7	7	0	7
486	5.35	3.88	5.75	5.34	499.47	2.6	Neutral	1.98	112	11	0	9
487	2.19	0.48	2.32	2.29	514.5	3.4	Neutral	2.1	83.3	9	0	10
488	7.04	2.81	11.35	10.09	514.5	2.6	Neutral	1.37	82.5	9	0	10
489	37.98	26.1	23.54	28.16	526.58	2.2	Base	3.3	58.9	8	0	9
490	12.64	17.46	20.3	13.77	443.45	NV	Neutral	1.94	84.5	7	2	7
491	23.98	13.51	23.09	18.32	439.48	2.95	Neutral	1.84	102	10	2	7
492	2.75	2.91	1.22	3.635	345.32	4	Neutral	3.59	39.8	4	0	4
493	1.748	0.81	2.263	1.998	504.58	3.1	Neutral	2.27	102	10	0	10
494	5.71	4.55	4.32	12.64	444.43		Acid	4.1	92.5	7	2	7
495	28.54	15.54	16.98	27.73	348.47	2.6	Neutral	1.62	74.8	5	2	4
496	0.64	2.46	1.46	0.11	502.04	3.3	Base	4.82	86.5	8	2	7
497	19.98	18.29	39.29	13.99	367.36	1.8	Neutral	1.41	63.5	6	1	3
498	7.49	10.48	9.12	2.49	519.02		Base	3.4	106	10	2	9
499	18.63	8.1	14.5	17.81	415.43	2.72	Neutral	3.62	87.8	8	2	5
500	22.99	25.52	36.76	42.94	432.44	2.1	Neutral	1.38	112	10	1	5
501	0.975	0.84	0.65	0.84	463.45	>4.25	Neutral	4.19	66.5	7	0	13
502	0.16	0.77	0.1	0.68	524.63	2.297	Acid	4.7	105	7	1	11
503	22.53	17.89	20.65	28.25	378.49	2.3	Neutral	0.923	83.5	6	2	5
504	3.88	1.44	2.87	2.43	519.01	3.6	Base	3.67	91.6	10	2	9
505	5.61	3.07	7.62	4.4	323.74	2.4	Neutral	0.881	74.9	6	1	4
506	12.46	1.655	3.68	27.78	358.19	1.1	Neutral	1.62	74.9	6	1	4
507	9.52	5.55	16.41	9.08	353.77	1.6	Neutral	-0.017	97.5	7	2	5
508	14.04	6.15	18.26	11.1	479.56	2.4	Neutral	3.52	128	11	1	9
509	0.38	0.38	0.81	0.11	338.76	3.7	Neutral	0.988	85.1	7	1	4
510	9.11	9.02	24.81	14.42	324.73	1.2	Neutral	-0.003	85.1	7	1	4
511	13.23	9.71	13.49	14.46	333.18	2.5	Neutral	1.7	56.2	5	1	3
512	3.71	1.58	2.91	3.61	362.78	1.4	Neutral	0.443	93.6	7	1	6
513	0.67	0.41	5.44	6.48	334.29	0.6	Acid	-0.973	126	9	2	5
514	3.61	0.81	2.9	4.01	367.8	2.2	Neutral	0.819	83.7	7	1	6
515	21.95	12.48	37.43	28.63	224.23	1.8	Neutral	-0.414	88.7	6	2	4
516	0.54	0.45	2	4.23	402.4	2.6	Neutral	3.21	98.5	7	1	5
517	1.57	0.94	1.57	1.26	298.73	3.7	Neutral	1.84	56.2	5	1	3
518	0.74	0.25	0.63	0.53	312.76	>4	Neutral	2.1	56.2	5	1	3
519	0.67	0.32	0.32	0.53	471.58	>3.7	Neutral	3.09	101	9	0	9
520	0.5	0.35	0.31	0.08	471.58	>3.47	Neutral	3.09	101	9	0	9
521	0.82	0.75	1.34	1.66	339.36	3.9	Neutral	2.17	74.9	6	1	4
522	1.79	1.34	1.68	1.95	356.38	3.35	Neutral	3.61	58.1	5	0	3
523	8.58	5.5	8.11	15.45	380.42	2.8	Neutral	2.85	89.8	6	3	6
524	45.8	35.8	48.89	55.04	501.6	1.1	Base	1.99	119	12	2	7
525	20.97	40.81	43.89	41.17	501.6	1.1	Base	2.03	119	12	2	8
526	5.075	2.449	4.158	5.205	519.01	3.3	Base	4.03	91.6	10	2	8
527	6.39	3.24	4.92	4.07	521.02	2.8	Base	4.17	91.6	10	2	10
528	3.68	0.92	2.42	2.8	448.54	3.5	Neutral	3.3	99	8	2	12
529	4.75	3.34	10.24	7.73	376.44	2.9	Neutral	3.61	82.5	7	1	4
530	33.96	14.33	29.16	35.65	580.75	2.32	Base	2.41	108	11	2	13
531	0.76	0.44	0.92	0.06	482.63	>3.5	Base	5.53	61.8	6	1	8
532	8.42	14.38	22.83	47.21	438.5	2.9	Neutral	3.08	98.6	7	3	9
533	10.38	9.84	39.99	24.1	421.5	2.75	Neutral	2.54	109	8	3	9
534	9.87	9.51	8.46	9.07	467.52	2.8	Neutral	2.15	89.6	7	1	5
535	6.87	1.67	3.11	5.925	444.57	3.6	Neutral	3.59	99	8	2	12
536	0.17	0.15	0.02	0.93	342.4	2.8	Acid	5.23	54.3	4	1	5
537	0.21	0.23	0.23	0.77	360.39	2.6	Acid	5.46	54.3	4	1	5
538	62.97	31.1	49.19	54.78	572.05	0.9	Base	3.06	111	10	3	12
539	7.92	12.21	12.47	8.25	425.57	2.4	Base	2.67	59.2	6	0	9
540	23.78	25.41	23.28	30.66	490.61	1.9	Base	3.29	91.9	10	2	11
541	15.6	19.34	16.12	14.54	498.59	2.4	Base	3.17	91.6	10	2	9
542	34.01	18.85	27.17	29.87	439.52	2.5	Neutral	-0.752	124	11	2	7
543	7.74	19.07	22.35	13.65	439.49	2.9	Neutral	2.7	109	8	3	9
544	0.57	0.47	0.12	1.36	358.41	2.3	Acid	5.27	59	4	1	6
545	19.89	27.94	21.04	21.17	413.54	2.5	Neutral	1.57	93.5	6	2	6
546	15.94	7.53	7.64	13.41	485.59	2.9	Base	4.43	92.1	9	3	10
547	27.79	19.15	25.68	25.18	556.99	2.2	Neutral	2.12	119	10	3	11
548	45.35	26.53	41.84	31.11	640.12	2.3	Base	2.25	120	11	3	14
549	44.26	27.09	29.05	42.6	600.1	1.6	Base	3.96	111	10	3	14
550	2.06	2.02	1.35	0.96	523.64	3.8	Base	4.37	78.7	9	2	7
551	0.06	0.1033	0.03	0.4933	383.45	3.433	Acid	4.64	64.5	5	1	4
552	45.52	33.79	57.36	39.21	363.38	1.8	Neutral	0.701	116	10	3	3
553	57.86	31.24	48.62	27.41	413.44	1.9	Neutral	0.097	147	12	3	6
554	1.5	0.52	0.07	0.55	369.42	3.1	Acid	4.46	64.5	5	1	4
555	0.09	0.17	0.08	0.46	369.42	3	Acid	4.46	64.5	5	1	4
556	32.17	18.96	34.46	49.01	612.11	2.3	Base	3.45	111	10	3	13
557	2.93	2.08	1.49	2.22	452.55	1.7	Acid	5.07	81.9	7	1	10
558	0.5367	0.21	0.4	2.922	402.43	2.575	Acid	3.92	74.7	6	1	4
559	0.15	0.03	3.64	0.06	416.45	>4.25	Acid	6.1	63.4	5	1	5
560	2.33	3.88	1.56	1.05	485.59	2.3	Base	4.16	92.1	9	3	10
561	0.61	1.78	3.47	1.81	457.43	2.6	Acid	3.12	126	8	3	4
562	0.8	0.37	1.69	3.41	459.42	1.9	Acid	3.4	117	7	3	4
563	3.83	5.79	21.1	10.26	409.41	1.4	Acid	2.58	117	7	3	2
564	49.46	20.34	33.66	31.87	644.55	1.8	Base	4.11	111	10	3	14
565	9.1	4.62	4.06	5.57	404.51	1.55	Zwitterion	1.98	78.5	5	3	7
566	0.49	0.97	0.16	0.44	535.6	4	Base	5.05	78.7	9	2	11
567	14.09	19.57	15.82	12.06	485.59	2.3	Base	4.23	92.1	9	3	10
568	0.83	0.51	0.72	1.26	388.51	2.55	Zwitterion	3.39	56	4	2	6
569	8.51	7.86	8.95	15.12	500.6	2.7	Base	3.48	89	10	2	10
570	28.28	7.15	8.73	21.67	500.6	2.5	Base	4.28	88.7	10	2	10
571	37.11	15.52	21.6	46.81	486.58	1.9	Base	3.78	88.7	10	2	10
572	3.565	2.38	2.595	2.38	418.53	1.912	Zwitterion	2.72	64.8	5	2	8
573	3.27	1.107	0.28	0.39	452.98	3.4	Zwitterion	3.61	64.8	5	2	8
574	4.19	8.08	7.18	7.75	512.62	2.8	Base	2.98	89	10	2	9
